# Supplementary material for: The spliceosome-associated protein Nrl1 suppresses homologous recombination-dependent R-loop formation in fission yeast
Source: Oxford University Press journal article supplement (doi:10.1093/nar/gkv1473), 2015-12-17
Supplement: gkv1473_Supplementary_Data.zip [file gkv1473_Supplementary_Data.zip]

# Colored PROMALS3D alignment (sequences in aligned order)

Conservation: 9 7756 6

NRDE2\_Dme 1 MS-----LFPAYGAG-----RTS 13

NRDE2\_Hsa 1 MA-----LFPAFAG-----LSEA 13

NRDE2\_Dre 1 MA-----LFPSFSG-----LSGS 13

NRDE2\_Mmu 1 MA-----LFPAFAD-----VSEA 13

NRDE2\_Gga 1 MA-----LFPAFAG-----APEPGEA 16

NRDE2\_Cel 1 -----MFRAYGNGLKN**PER**ISGENPD**LYTQT**RAAVQQRATTT**LKRNEKQKLAVQ**ND**SVFQ**QVGIGES 63

NRL1\_Spo 1 MPSNHNTSVPKFS----- 13

Consensus aa: Ms.....**hFPT**@ts.....pt

Consensus ss:

Conservation: 6 6 6

NRDE2\_Dme 14 AAGS-----AKQTTKPGEEEPSTGGNWKKN**ESYI**----- 42

NRDE2\_Hsa 14 PDGG-----S--**SRKE**-----**LDW**LSNPSFC**VGSITS**----- 38

NRDE2\_Dre 14 NSSA-----ESKAPAD-----LEWLSNQSFSTEDALK----- 40

NRDE2\_Mmu 14 SGDG-----AFRKE-----LDWLSNPSFRVGNLTS----- 38

NRDE2\_Gga 17 PAGS-----SEGSRKE-----LDWLSNPSFSTEDALL----- 43

NRDE2\_Cel 64 DSDDDNGG**VRIRM**SPHRYID**P**-----**DDVFTLPEVKKQNAL**RD**AKIA**AA**AAQATA**YNTFPSPVKSLNG 125

NRL1\_Spo 14 -----SFNSVK----- 19

Consensus aa: stss.....c.....**s**h**bp**..**ph**.....

Consensus ss: h hh hhhhhhhh

Conservation:

NRDE2\_Dme ----- 97

NRDE2\_Hsa 39 -----**LSQQTEA**PAHVSEGLP-----L**TRSHL**KSESSDES**DTNKKLKQTSR**KKKK**KKKKRKHQH**HHKK 86

NRDE2\_Dre 41 -----THQRATDRARAETE-----EPAGTSEEKHKERGDNHGSKKKR**KKKKKH**--K 102

NRDE2\_Mmu 39 -----LSRQTEEV**TALASEG**SPPPRYSFIR**SPLKSEL**SGESNTSE**KLAQTSR**KKKK**KKKKRKHQH**HRK 99

NRDE2\_Gga 44 -----LHQR**TT**EAANLTPEKSP-----LIR**STSR**SDLSGESDTDES**LKKSS**---KKR**KKKKKKHH**HYKT 180

NRDE2\_Cel 126 CQDPPE**TSQQSTS**R**KRS**ASNSRS-----PS**RS**HSRR-----YDRDNGR**QSR**S**REK**RR**KKERRR**----- 31

NRL1\_Spo 20 -----AKKNP-----ITKSN-----KK

Consensus aa: .....sp.....

Consensus ss: hhh hhhh hhhhhhhhhhhhhhhhhhh

Conservation: 6 57 7 6 6 6 67 6 9 6 66

NRDE2\_Dme 43 --**KKHV**-NIATQGPESDSSSSTE-D**SEDEA**-----**DKRKQDDVT**KT**KNVH**-----RGKTL----- 88

NRDE2\_Hsa 98 **TKRK**HG-PSSSS-----RSETDT**SEKDKPSR**GV**GSKKESEEP**NQGNNA---AADTGHRF**WLEDI**- 155

NRDE2\_Dre 87 KKRSRD-**NSESS**-----GFESDTIYPSDLL-----KKE-----NTDREEAQVRVSETFMWLDL- 134

NRDE2\_Mmu 103 TKRRHE-QLSSS-----GSESDEAGKDRASRSIRDDQKEAEKPCQGSNAAA**AVAAAGHRSIWLEDI**- 164

NRDE2\_Gga 100 KKKAKG-DSSSS-----ESDLTKCIKD**KAA**-----AKQAQFPLEFSLD-DKTSNLT**SNRSVW**LDDV- 154

NRDE2\_Cel 181 -**KRSSRS**SSSS-**RS**-----**RDRSSR**ARDTSS**HTLM**KMN-----KPA**YAF**LTD**EE** 224

NRL1\_Spo 32 YRSSHD-QVSSN-----HAKSSFP**SH**-- 51

Consensus aa: .**++p**+s.p.t**Ss**.....**S**.....c-.....p+p.....**+**..**@Lpc**..

Consensus ss: hhh hhhhhhhh hhhhhhhhhh ee

Conservation: 9 7 5 7 6 6 6 67 6 9 6 66

NRDE2\_Dme 89 ----EFDSSDG**FYVD**KVGNSSYR**NIK**TLKKPARP--**RYK**TRM----- 124

NRDE2\_Hsa 156 ----QAVTGET**FRTD**KKPD**PANWE**YKSLYRGDIA--**RYKR**KGDS**CLG**INPK-**KQCIS**WE-GT**ST**EKKH-S 216

NRDE2\_Dre 135 ----QTPD**SPFCIDRR**ADRANWQYKSLYRGDIA--**RYKR**KGDSCLGLDLR-TQAVTWT-DGGPEKKR-V 195

NRDE2\_Mmu 165 ----HDLT-DVFRTDKKPD**PANWE**YKSLYRGDIA--**RYKR**KGDSCLGINPK-KQCISWE-GASA**AKKH**-S 224

NRDE2\_Gga 155 ----QAFTTETFRIDKKSD**PANWAY**KSLYRGDIARYRYKRRGESCLGLDTK-KQCI**AWD**-SPASEKKQ-L 217

NRDE2\_Cel 225 **YRTCD**AY**ISSAFITQ**TKSDCENY**TQG**-VP**KKEIA**--**KCRLSVK**FIVGLEHN-NIL**FNNI**YGA**EYARDK**-E 289

NRL1\_Spo 52 ----RSIQSN**FAV**DTKG**QKNLL**YG-IN**KRP**VP--KYHRSSSS**VYG**SAPLL**RIVK**ESKEGITLN**KKK**SL 113

Consensus aa: ....p..**h**sp**sF**..**hDp**+t-..**h**h..**l**..**+**..**s**l..**+**Y+p**psp**..**hhG**.....p**h**h**bp**...t...**+**c+..

Consensus ss: eeee hhhhhe hhe eee eeee hhhh

Conservation: 9 6 7 966 6

NRDE2\_Dme 125 -----**KRLG**DGKYNP-----HDFSRAHS----- 142

NRDE2\_Hsa 217 RK----QVERYFTKKS**VGLM**NIDG---VAISSKTEPPSS**EP****ISFIP**VKDLEDA**A**-PVT--TWLNPLGIY- 275

NRDE2\_Dre 196 DK----KAERYFSSSTRQ**LLQ**TRGL**LALPIL**SEGSATNSDPYIKLAVCAEEQGSSTQ**T**PESWVNPLGIY- 260

NRDE2\_Mmu 225 HR----HLERYFTKKN**VGLM**RTEG---IAVC**SNPE**PASSEPVTFIPVKDSAE**AAT**PVT--SWLNPLGIY- 284



|               |     |                                                                                                                                     |     |
|---------------|-----|-------------------------------------------------------------------------------------------------------------------------------------|-----|
| NRDE2_Hsa     | 581 | LAAERSRDQRHWRPWRPDKTK-KQTEEDCEDPER <b>QVLFDD</b> IG-QSLI--RLSS <b>HD</b> LQFQLVEAF <b>LQ</b> FLGV                                   | 646 |
| NRDE2_Dre     | 568 | LDVEASREANQWLPWRPDKTK-GQSEEDCEDPD <b>RQVLFDD</b> IG-PSMI--RVDRADLQAQLILAFLQFLGL                                                     | 633 |
| NRDE2_Mmu     | 590 | LAVERSRDQRHWRPWRPDKTK-KQTEEDCEDPER <b>QVLFDD</b> IG-QSLI--RLSSPD <b>LQ</b> FQLIQAFLQFLGV                                            | 655 |
| NRDE2_Gga     | 587 | MDIEYSRESRHWLPWRPDKTK-NQAEEDCEDPER <b>QVLFDD</b> LG-PSLI--QLSNPDIQHQLLYSFLQFLGV                                                     | 652 |
| NRDE2_Cel     | 629 | <b>IEVEREMMNID</b> ARVKRTKLKDCELYEDHVDDLE <b>TC</b> ELWDIIP <b>FDRI</b> RYEAPG <b>DCAN</b> FD <b>FVQPF</b> LELLGV                   | 698 |
| NRL1_Spo      | 428 | <b>YLNESKFDT</b> -NPPPRSTMSCR--KLSGIDDP <b>F</b> RY <b>IVFN</b> DIQ- <b>DFIV</b> -- <b>CFE</b> SET <b>IAFA</b> FKY <b>KFFA</b> FCGV | 490 |
| Consensus aa: |     | <i>h.hE.p.ps.ph.Pb+scbhc.p..bcsh-<b>DS</b>-Rbh1@Dc1s.s.1h...hps.shphph1bsF1phhG1</i>                                                |     |
| Consensus ss: |     | hhhhhhhhhh eeeee hhhh e hhhhhhhhhhhhhhh                                                                                             |     |

|               |     |                                                                                                   |     |  |
|---------------|-----|---------------------------------------------------------------------------------------------------|-----|--|
| Conservation: | 7   | 6                                                                                                 | 6   |  |
| NRDE2_Dme     | 452 | P-LIR--SASLADKL <b>NPCI</b> EDFGE <b>SEAI</b> EMLF----- <b>AAI</b> VDRHSYA---VASLQYQFDA-AMIDLAREM | 509 |  |
| NRDE2_Hsa     | 647 | P---S--GFTPPASCL <b>LY</b> LAMDE-----NSIFDNGLYDEKPLTFFNPLFSGASCVGRM <b>DRL</b>                    | 696 |  |
| NRDE2_Dre     | 634 | PGALT--KFFTASSSSFL-LDD-----LTFLEEGPDPERPLTSYDLPVTGICAVGHMTCL                                      | 685 |  |
| NRDE2_Mmu     | 656 | P---S--GFLPPASCL <b>LY</b> LAMDE-----SSIFESELYDEKPLTYFNPSFSGISCVGSMEQL                            | 705 |  |
| NRDE2_Gga     | 653 | P-CIS--RLFPPN--LYIAMDE-----NNIFDNVLSDEKPLTSIDTPLSGFNSIGHMDTM                                      | 702 |  |
| NRDE2_Cel     | 699 | K-FLN--STNCFTTT-----EQ <b>II</b> SDWISNDSTVNFYKTP-TYT-----                                        | 733 |  |
| NRL1_Spo      | 491 | PLFPPGISTNS <b>W</b> ----- <b>FAS</b> -YDKGIY <b>NLLFG</b> MASSEFINGQ <b>IAEKN</b> SFQFP-----C    | 538 |  |
| Consensus aa: |     | <i>P...s..ph.s.s.....S.....shhpp...scps1s.hp...s.....h</i>                                        |     |  |
| Consensus ss: |     | hhhh hhhh                                                                                         |     |  |

|               |     |                                                                                                                                                                  |     |   |   |
|---------------|-----|------------------------------------------------------------------------------------------------------------------------------------------------------------------|-----|---|---|
| Conservation: |     | 65                                                                                                                                                               | 5   | 7 | 7 |
| NRDE2_Dme     | 510 | SVTPSYMPHLVG <b>HKLY</b> ADT----- <b>VSNMLLK</b> CV <b>E</b> --VF <b>IG</b> EESKR <b>RRLLILYL</b> RFQ <b>KL</b> L <b>IV</b> --                                   | 563 |   |   |
| NRDE2_Hsa     | 697 | GYPR <b>WTRG</b> Q <b>NRE</b> ---G <b>EEF</b> ----- <b>IRNVFHL</b> VMP--L <b>FS</b> GKE-- <b>KSQ</b> LC <b>FSW</b> LQY <b>EIAK</b> VI <b>WC</b>                  | 747 |   |   |
| NRDE2_Dre     | 686 | SGCRRQAGLCKA---G <b>EEF</b> -----LHNVLHQT <b>LR</b> --LVPAQD--QA <b>AIT</b> LCWLQY <b>EKLK</b> VLRC                                                              | 736 |   |   |
| NRDE2_Mmu     | 706 | GRPRWTKGHNRE---G <b>EEF</b> -----VRNVFHLV <b>LP</b> --LLAGKQ--KS <b>QLS</b> LSWLRY <b>EIAK</b> VI <b>WC</b>                                                      | 756 |   |   |
| NRDE2_Gga     | 703 | LRRRHHIGHCKD---G <b>EEF</b> -----IQNVFHV <b>LSP</b> --L <b>FS</b> GKE--KS <b>NLS</b> ICWLQY <b>EISK</b> VV <b>QC</b>                                             | 753 |   |   |
| NRDE2_Cel     | 734 | --E <b>KKCF</b> EV <b>GNN</b> --- <b>IL</b> K <b>F</b> ----- <b>MLYNRL</b> KL-----T <b>ENN</b> -- <b>PEY</b> L <b>DKT</b> MV <b>KYLL</b> AM <b>L</b> VT <b>E</b> | 778 |   |   |
| NRL1_Spo      | 539 | SILPSYIDLFISL <b>MSF</b> KNLNFKLFDYNLA <b>HHV</b> K <b>ESMER</b> AF <b>HQ</b> L <b>VFS</b> AD <b>DEY</b> LA <b>SV</b> ---Y <b>LIY</b> L <b>KQ</b> ME <b>TKN</b>  | 605 |   |   |
| Consensus aa: |     | <i>t...phhsh..s...bch.....lppshh.hh...lhstpp.....l.b.@LpYbb.b11..</i>                                                                                            |     |   |   |
| Consensus ss: |     | hhhhhh hhhh hhhhhhhhhh h hhhhhhhhhhhhhhhhhhhhhhh                                                                                                                 |     |   |   |

|               |     |                                                                                                                                                                                                                                                                   |     |   |   |   |    |   |   |   |   |
|---------------|-----|-------------------------------------------------------------------------------------------------------------------------------------------------------------------------------------------------------------------------------------------------------------------|-----|---|---|---|----|---|---|---|---|
| Conservation: | 5   | 67                                                                                                                                                                                                                                                                | 7   | 5 | 6 | 7 | 66 | 5 | 7 | 9 | 7 |
| NRDE2_Dme     | 564 | L <b>HK</b> SM <b>GK</b> ---L <b>TKK</b> FF <b>KDKR</b> TRMR <b>KLI</b> N <b>LT</b> E--NRNV <b>ISF</b> Y <b>TE</b> QAL <b>CEI</b> EAK <b>HYRL</b> GF <b>SI</b> S <b>RII</b> TKKS                                                                                  | 627 |   |   |   |    |   |   |   |   |
| NRDE2_Hsa     | 748 | L <b>HT</b> KN <b>KK</b> --- <b>RLKS</b> Q <b>GK</b> CK <b>KLAK</b> N <b>LL</b> KE <b>PE</b> --NCNN <b>FCL</b> W <b>KQ</b> YA <b>HL</b> EW <b>LL</b> GN <b>TED</b> ARK <b>VFD</b> TAL <b>G</b> MAG                                                                | 811 |   |   |   |    |   |   |   |   |
| NRDE2_Dre     | 737 | L <b>R</b> SGN <b>KR</b> ---Q <b>MKS</b> Q <b>GK</b> RS <b>KRLAK</b> R <b>LL</b> KE <b>PE</b> --NRGSLALWREYA <b>HL</b> EW <b>LL</b> GN <b>LEE</b> ARK <b>VFD</b> TAL <b>S</b> MGV                                                                                 | 800 |   |   |   |    |   |   |   |   |
| NRDE2_Mmu     | 757 | L <b>H</b> TK-K <b>K</b> --- <b>RLKS</b> Q <b>GK</b> SK <b>KLAK</b> N <b>LL</b> KE <b>PE</b> --NRN <b>NF</b> CLW <b>KQ</b> YA <b>HL</b> EW <b>LL</b> GN <b>TED</b> ARK <b>VFD</b> TAL <b>S</b> MAG                                                                | 819 |   |   |   |    |   |   |   |   |
| NRDE2_Gga     | 754 | I <b>Q</b> TK <b>KKK</b> --- <b>KLKA</b> Q <b>GK</b> RS <b>KKLAK</b> N <b>LL</b> KA <b>PD</b> --NRN <b>N</b> LALW <b>KLYA</b> LE <b>WLL</b> GN <b>TDD</b> ARK <b>VFD</b> TAL <b>C</b> TAG                                                                         | 817 |   |   |   |    |   |   |   |   |
| NRDE2_Cel     | 779 | <b>ASEQ</b> E <b>KK</b> L <b>NF</b> H <b>SF</b> KL <b>N</b> L <b>N</b> KL--V <b>G</b> T <b>FIT</b> K <b>HPD</b> I <b>FK</b> RAM <b>L</b> SK <b>IT</b> G <b>IV</b> Y <b>ME</b> K <b>FVS</b> W <b>W</b> ERAL <b>K</b> E <b>Q</b> E <b>KV</b> VE <b>A</b> D <b>E</b> | 846 |   |   |   |    |   |   |   |   |
| NRL1_Spo      | 606 | <b>L</b> ----- <b>SEEK</b> P <b>VN</b> K <b>IVK</b> K <b>IL</b> KK--Y <b>D</b> SS <b>VSV</b> W <b>NTYA</b> Q <b>L</b> EH <b>L</b> SGA <b>ET</b> MA <b>ETI</b> F <b>KTI</b> F <b>QI</b> HA                                                                         | 659 |   |   |   |    |   |   |   |   |
| Consensus aa: |     | <i>lpppp..K....hK.p.+p.pp1h+p1LK.s--.pcss1th@p.hAhhEhhht.hc.A.p1hceph1.h.s</i>                                                                                                                                                                                    |     |   |   |   |    |   |   |   |   |
| Consensus ss: |     | h hhhhh hhhhhhhhhhhhhhhhh hhhhhhhhhhhhh h hhhhhhhhhhhhhhhhhhhhh                                                                                                                                                                                                   |     |   |   |   |    |   |   |   |   |

|               |     |                                                                                                                                                                                                                                      |     |
|---------------|-----|--------------------------------------------------------------------------------------------------------------------------------------------------------------------------------------------------------------------------------------|-----|
| Conservation: |     | 7                                                                                                                                                                                                                                    |     |
| NRDE2_Dme     | 628 | E <b>ES</b> SC <b>IS</b> CV <b>DTM</b> HL <b>YL</b> V <b>CA</b> EL----- <b>HI</b> HR <b>GRI</b> ----- <b>SKA</b>                                                                                                                     | 658 |
| NRDE2_Hsa     | 812 | --S <b>REL</b> K <b>D</b> SD <b>L</b> CEL <b>S</b> LL <b>Y</b> AEL----- <b>E</b> VEL <b>S</b> PE <b>V</b> RR <b>AAT</b> - <b>ARA</b>                                                                                                 | 846 |
| NRDE2_Dre     | 801 | --S <b>R</b> GLNDHV <b>L</b> CK <b>L</b> CFL <b>Y</b> AQL----- <b>E</b> VE <b>Q</b> AL <b>S</b> SET <b>V</b> ST <b>F</b> SK <b>A</b>                                                                                                 | 836 |
| NRDE2_Mmu     | 820 | --S <b>S</b> ELKDREL <b>C</b> EL <b>S</b> LL <b>Y</b> AEL----- <b>E</b> MEL <b>S</b> PD <b>S</b> RG <b>ATT</b> - <b>GRA</b>                                                                                                          | 854 |
| NRDE2_Gga     | 818 | --T <b>G</b> GLK <b>S</b> P <b>Q</b> LC <b>S</b> LL <b>Y</b> AQL----- <b>E</b> VEL <b>L</b> Q <b>S</b> LEG <b>AVT</b> - <b>SRA</b>                                                                                                   | 852 |
| NRDE2_Cel     | 847 | --R <b>R</b> K <b>NYK</b> - <b>EIK</b> M <b>EEG</b> V <b>DDV</b> K <b>FD</b> V <b>ILL</b> K <b>KD</b> K <b>ERV</b> Q <b>T</b> IR <b>DK</b> IR <b>DM</b> IA <b>IP</b> K <b>ST</b> E <b>KLI</b> Q <b>SAD</b> SS <b>LP</b> - <b>TLQ</b> | 912 |
| NRL1_Spo      | 660 | -- <b>S</b> QL <b>RY</b> I <b>D</b> N <b>L</b> V <b>Y</b> K <b>N</b> W <b>A</b> FR----- <b>K</b> LL <b>I</b> ND <b>T</b> E <b>G</b> C----- <b>L</b>                                                                                  | 688 |
| Consensus aa: |     | <i>..pp.lp..phhp1.b1hAp1.....chcb..p..s...s.h</i>                                                                                                                                                                                    |     |
| Consensus ss: |     | h hhhhhhhhhhhhh hhhhh hhh                                                                                                                                                                                                            |     |

|               |     |                                                                                                                                                                                                                                                              |     |   |
|---------------|-----|--------------------------------------------------------------------------------------------------------------------------------------------------------------------------------------------------------------------------------------------------------------|-----|---|
| Conservation: | 7   | 7                                                                                                                                                                                                                                                            | 6   | 6 |
| NRDE2_Dme     | 659 | I <b>GIL</b> V <b>S</b> LC <b>LE</b> K <b>H</b> AG <b>V</b> K <b>Q</b> TT <b>V</b> YS <b>K</b> E <b>Q</b> V <b>L</b> K <b>GL</b> RNA <b>E</b> K <b>M</b> V <b>R</b> A <b>EL</b> K <b>S</b> L <b>D</b> T <b>Q</b> PA <b>EMS</b> L <b>EE</b> Y <b>F</b> Q----- | 716 |   |
| NRDE2_Hsa     | 847 | V <b>HIL</b> T <b>K</b> L <b>T</b> -E <b>SS</b> PY <b>G</b> P <b>Y</b> T <b>G</b> Q <b>V</b> LAV <b>HIL</b> K <b>ARK</b> AY <b>EH</b> AL <b>QD</b> CL <b>G</b> D <b>SC</b> VS----NP <b>APT</b> D <b>S</b> -----                                              | 899 |   |
| NRDE2_Dre     | 837 | V <b>YIL</b> T <b>K</b> LA-EG <b>AS</b> Y <b>T</b> PF <b>S</b> G <b>Q</b> IN <b>P</b> V <b>IL</b> K <b>ARK</b> AY <b>E</b> Q <b>ALL</b> S <b>IL</b> PE <b>Q</b> N <b>T</b> D----SN <b>AG</b> ASK-----                                                        | 889 |   |
| NRDE2_Mmu     | 855 | V <b>HIL</b> TR <b>L</b> T-E <b>SS</b> PY <b>G</b> P <b>Y</b> T <b>G</b> Q <b>V</b> SV <b>T</b> Q <b>V</b> L <b>K</b> ARK <b>AY</b> EL <b>AL</b> Q <b>D</b> CL <b>G</b> Q <b>S</b> CA <b>S</b> ----SP <b>AP</b> AE <b>A</b> -----                            | 907 |   |
| NRDE2_Gga     | 853 | V <b>HIL</b> T <b>K</b> LA-ES <b>G</b> PY <b>AP</b> Y <b>NG</b> Q <b>V</b> LS <b>V</b> SV <b>L</b> K <b>ARK</b> TY <b>EH</b> AL <b>QD</b> Y <b>L</b> N <b>K</b> AP <b>V</b> S----D <b>Q</b> D <b>G</b> AS <b>N</b> -----                                     | 905 |   |
| NRDE2_Cel     | 913 | L <b>H</b> LYAN <b>V</b> L-----R <b>GRL</b> S <b>IL</b> N <b>Q</b> NA <b>L</b> E <b>ET</b> RD <b>V</b> F <b>C</b> KE <b>IL</b> G----I <b>H</b> T <b>S</b> E <b>F</b> ES <b>DE</b> ALL <b>L</b> AL <b>D</b> Q <b>G</b>                                        | 964 |   |
| NRL1_Spo      | 689 | V <b>I</b> IK <b>CL</b> L <b>F</b> -P <b>G</b> D <b>K</b> SL <b>T</b> SD <b>N</b> N-----R <b>A</b> SE <b>ML</b> F <b>G</b> M <b>L</b> EN <b>C</b> ASK-----                                                                                                   | 723 |   |
| Consensus aa: |     | <i>1h1hhpLh.....ss.....p1.+tpcsbh.h1phhshp..h.....p.....</i>                                                                                                                                                                                                 |     |   |
| Consensus ss: |     | hhhhhhhh hh h hhhhhhhhhhhhhhhhhhhhh hhh                                                                                                                                                                                                                      |     |   |



# Colored PROMALS3D alignment (sequences in aligned order)

Conservation: 9

|               |   |                                                                      |    |
|---------------|---|----------------------------------------------------------------------|----|
| CWF4_Spo      | 1 | MTS-----                                                             | 3  |
| SYF3_human    | 1 | MTA-----TVEN-----LTFQKDT-----LGNVDKN-                                | 22 |
| CWF3_Spo      | 1 | M-----                                                               | 1  |
| SYF1_human    | 1 | MV-----                                                              | 2  |
| NRDE2_Cele    | 1 | MF--RAYGNGLKNPERISGENPDLYTQTRAAVQQRATTTLKRNKQKLAVQNDSVFQQVGIGESDSDDD | 68 |
| NRDE2_human   | 1 | MALFPAFA-----GLSEAPDGG-                                              | 17 |
| NRL1_Spo      | 1 | MPS-----NH                                                           | 5  |
| Consensus aa: |   | Mh.....                                                              |    |
| Consensus ss: |   |                                                                      |    |

Conservation:

|               |    |                                                                         |     |
|---------------|----|-------------------------------------------------------------------------|-----|
| CWF4_Spo      |    | -----                                                                   |     |
| SYF3_human    | 23 | --TSRLELR-----SYSLAGRH-----GSTEPLVLAWSSQF                               | 51  |
| CWF3_Spo      |    | -----                                                                   |     |
| SYF1_human    |    | -----                                                                   |     |
| NRDE2_Cele    | 69 | NGGVRIRMSPHYRIDPDDVFTLP EVKKQNALRDAKIAARAAQATAYNTFPSVKSLNGCQDPPETSQQSTS | 138 |
| NRDE2_human   | 18 | --SSRKEL-----DWLSNPSCVGSIT-----SLSQQTEA                                 | 45  |
| NRL1_Spo      | 6  | N-TSVPKF-----SSFNSVKA-----                                              | 20  |
| Consensus aa: |    | .....                                                                   |     |
| Consensus ss: |    |                                                                         |     |

Conservation:

|               |     |                                                                       |     |
|---------------|-----|-----------------------------------------------------------------------|-----|
| CWF4_Spo      |     | -----                                                                 |     |
| SYF3_human    | 52  | RRLTWGCALDALHRSPCVAA-SQHGVTH--LIRS-----SRTPHS-                        | 88  |
| CWF3_Spo      |     | -----                                                                 |     |
| SYF1_human    |     | -----                                                                 |     |
| NRDE2_Cele    | 139 | RKRSASNSR-SPSRSHSRRYDRD---NGRQSRSSREKKRRKKERRR-----KRSSSRSSS--        | 189 |
| NRDE2_human   | 46  | APAHVSEGL-PLTRSHLKSESSDESNTKKKLKQTSRKKKKKKKKRKHQHHKTKRKHGPPSSSSRSETDT | 114 |
| NRL1_Spo      | 21  | -----KKN-PITKSN-----KKYRSSHDQVSSNHA----                               | 44  |
| Consensus aa: |     | .....                                                                 |     |
| Consensus ss: |     |                                                                       |     |

Conservation:

|               |     |                                                                        |     |
|---------------|-----|------------------------------------------------------------------------|-----|
| CWF4_Spo      |     | -----                                                                  |     |
| SYF3_human    | 89  | -----TRCRKEDAQPGHHGNGAASVTAQAR--GQR-----SVLQVPL-----PV                 | 125 |
| CWF3_Spo      |     | -----                                                                  |     |
| SYF1_human    |     | -----                                                                  |     |
| NRDE2_Cele    | 190 | -----SSRSRDRSSSRARDTSSHTLMKMKNKA-KYAFLTDEEYRTCDAYISSAFITQTKSDCENYTGQ-V | 251 |
| NRDE2_human   | 115 | DSEKDKPSRGVGGSKKESEEPNQGNAAADTGHRFVWLED-----IQAVTGETFRDCKKPDPAWYKSL    | 179 |
| NRL1_Spo      | 45  | -----KSSFPSH-----RSIQSNFVDTKGEKQNLLYG-I                                | 73  |
| Consensus aa: |     | .....                                                                  |     |
| Consensus ss: |     |                                                                        |     |

Conservation:

|               |     |                                                                       |     |
|---------------|-----|-----------------------------------------------------------------------|-----|
| CWF4_Spo      | 4   | -----EAPRVKNKNPAPIQIS                                                 | 19  |
| SYF3_human    | 126 | PRS---CLFSESFVSVSSQ-SRFLASVPGTGVQRSTAADMAASTAAGKQRI PKVAKVKNKAPAEVQIT | 190 |
| CWF3_Spo      | 2   | -----GDVIPLKVNFDLIN                                                   | 15  |
| SYF1_human    | 3   | -----VMARLSRPERPDLVFE                                                 | 18  |
| NRDE2_Cele    | 252 | PKKEIAKCRLSVKFIVGLEHN-NILFNNIYGA-----EYARDKENRP----F                  | 293 |
| NRDE2_human   | 180 | YRGDIARYKRGDSCLGINPK-KQCISWEGTS-----TEKKHSRK-----                     | 218 |
| NRL1_Spo      | 74  | NKRPVPKYHRSSSSVYGSAPLLRIVKESKEGI-----TLNKKK---SLEIKYD                 | 118 |
| Consensus aa: |     | .....p h s + . p p . s . . . . .                                      |     |
| Consensus ss: |     | eee h h                                                               |     |

Conservation: 65 5

|            |     |                                             |     |
|------------|-----|---------------------------------------------|-----|
| CWF4_Spo   | 20  | AEQLLREAVRQ-----DVA-----FVPP-KINITDLEEL--   | 48  |
| SYF3_human | 191 | AEQLLREAKEREL-----ELL-----PPPP-QQKITDEEEL-- | 220 |
| CWF3_Spo   | 16  | VDDEPFEELELLR-----DPY-----SLKS-WLRYIKTHE--- | 43  |
| SYF1_human | 19  | EEDLPYEEEIMR-----NQF-----SVKC-WLRYIEFKQ---  | 46  |





|                      |     |        |                   |                       |          |                |          |      |     |       |
|----------------------|-----|--------|-------------------|-----------------------|----------|----------------|----------|------|-----|-------|
| Conservation:        |     | 5      | 5                 | 7                     |          |                |          |      |     |       |
| CWF4_Spo             | 441 | IEFEDA | IK-----           | QFDR                  | C---RILY | EKWILYDP-----E | 466      |      |     |       |
| SYF3_human           | 613 | IELELQ | LR-----           | EFDR                  | C---RKLY | EKFLEFGP-----E | 638      |      |     |       |
| CWF3_Spo             | 487 | LDLEES | VG-----           | TIET                  | T---RKLY | DRVFELKI-----A | 512      |      |     |       |
| SYF1_human           | 491 | ADLEES | LG-----           | TFQS                  | T---KAVY | DRILDLRI-----A | 516      |      |     |       |
| NRDE2_Cele           | 931 | ALEETR | DFCKEILGIHTSEFESD | ---                   | EALLL    | ALDQGLN-----E  | 967      |      |     |       |
| NRDE2_human          | 871 | ILKA   | -----             | ---                   | RKAYE    | -----H         | 880      |      |     |       |
| NRL1_Spo             | 714 | FGMLEN | CA-----           | SKEELLYVCLIIYTIWTHCTD | MDSMDN   | CVYLCIQKFESY   | GWGASSEM | CYFS | 772 |       |
| <u>Consensus aa:</u> |     | h      | .bbpp             | .....                 | pb-p     | ....c          | .Iyp     | .h   | .p  | ..... |
| <u>Consensus ss:</u> |     | hhhhh  |                   | hhhh                  |          | hhhhhhhhhh     |          |      |     |       |

|                      |     |         |         |                                  |                      |                      |                       |          |       |     |    |    |    |       |    |       |
|----------------------|-----|---------|---------|----------------------------------|----------------------|----------------------|-----------------------|----------|-------|-----|----|----|----|-------|----|-------|
| Conservation:        |     |         | 5       |                                  | 55                   | 5                    |                       |          |       |     |    |    |    |       |    |       |
| CWF4_Spo             | 467 | ACAP    | -----   | ---                              | WLG                  | AALETKLGD            | -----SDRARALYNLAVNQPI | -----499 |       |     |    |    |    |       |    |       |
| SYF3_human           | 639 | NCTS    | -----   | ---                              | WIK                  | FAELETLGD            | -----IDRARAIYELAISQPR | -----671 |       |     |    |    |    |       |    |       |
| CWF3_Spo             | 513 | TPQV    | -----   | ---                              | VVNY                 | ANLLEENAY            | -----FEDSFKIYERGV     | ALFS     | 545   |     |    |    |    |       |    |       |
| SYF1_human           | 517 | TPQI    | -----   | ---                              | VINY                 | AMFLEEHKY            | -----FEESFKAYERGISL   | FK       | 549   |     |    |    |    |       |    |       |
| NRDE2_Cele           | 968 | LLEHCKE | KNLESVD | SIPELPRAEALCEALKVVAVFVFLDKMAFSRR | RAVDCLIANAITKFEQFEAK | ----                 | 1033                  |          |       |     |    |    |    |       |    |       |
| NRDE2_human          | 881 | ALQDCL  | GDSC--- | VSNPAPTDCSRLISLAKCFMFLQYL        | TIG                  | -----IDAAVQIYEQVFAKL | NSSVFPE               | 941      |       |     |    |    |    |       |    |       |
| NRL1_Spo             | 773 | YCSL    | -----   | ---                              | IFY                  | YQATTLQFYN           | -----LPKVRPF          | EKGVT    | LFS   | 805 |    |    |    |       |    |       |
| <u>Consensus aa:</u> |     | h       | .p      | .....                            | hb                   | .@h                  | .h                    | .b       | ..... | h   | .s | .h | @p | .shsb | .p | ..... |
| <u>Consensus ss:</u> |     | hhh     |         |                                  | hhhhhhhhhh           |                      | hhhhhhhhhhhhhh        |          |       |     |    |    |    |       |    |       |

|                      |      |       |                  |                                        |                   |                |                 |                 |             |              |      |    |       |   |   |     |
|----------------------|------|-------|------------------|----------------------------------------|-------------------|----------------|-----------------|-----------------|-------------|--------------|------|----|-------|---|---|-----|
| Conservation:        |      |       | 5                | 5                                      |                   | 5              | 566             | 5               | 6           | 66           |      |    |       |   |   |     |
| CWF4_Spo             | 500  | ----- | LETPEL           | VWKAYIDFEFEEM                          | -----EYG          | -KARSIYQQL     | LRTAPH          | ---VKVWIS       | FANFE       |              | 547  |    |       |   |   |     |
| SYF3_human           | 672  | ----- | LDMPEV           | LKSYIDFEIEQE                           | -----ETE          | -RTRNL         | YRLLQRTQH       | ---VKVWIS       | FAQFE       |              | 719  |    |       |   |   |     |
| CWF3_Spo             | 546  | ----- | YPVAFEL          | WNLYLTKFVKRYQGT                        | ---HME            | -RTRDL         | FEQALEGCPPEFS   | KSIYLL          | YADFE       |              | 599  |    |       |   |   |     |
| SYF1_human           | 550  | ----- | WPNVSD           | IWSTYLT                                | KFIARYGGR         | ---KLE         | -RARDL          | FEQALDGC        | PPKYAKTLYLL | YAQLE        | 603  |    |       |   |   |     |
| NRDE2_Cele           | 1034 | ----- | -KNDFNR          | GTYEKYCDQIDLFKITDTLITFFSHKKHRI         | YNNENFKKLIFQ      | ASQAFPCD       | ---SKY          | ----            | AKML        |              | 1096 |    |       |   |   |     |
| NRDE2_human          | 942  | ----- | GS               | GEGDSASSQSWTSVLEAITLMHTSLLRFHMKVSVYPLA | -PLREALSQALKLYPGN | ---QVLWRSYVQIQ |                 |                 |             |              | 1008 |    |       |   |   |     |
| NRL1_Spo             | 806  | ----- | ANT              | ---AIWEVYIFFESKL                       | RQEN              | ---KPKI        | -RAMKILKSASNAVV | ---TACWYLFYVAVQ |             |              | 855  |    |       |   |   |     |
| <u>Consensus aa:</u> |      | ..... | hss              | .b                                     | .lhphhhsbbh       | .....          | h               | .ph             | +p          | lhpph        | .p   | hs | ..... | h | @ | hph |
| <u>Consensus ss:</u> |      |       | hhhhhhhhhhhhhhhh |                                        | hh                | hhhhhhhhhhhh   |                 | hhhhhhhhhhhh    |             | hhhhhhhhhhhh |      |    |       |   |   |     |

|                      |      |                    |                               |                    |                    |                              |                |      |     |              |    |         |     |       |
|----------------------|------|--------------------|-------------------------------|--------------------|--------------------|------------------------------|----------------|------|-----|--------------|----|---------|-----|-------|
| Conservation:        |      |                    |                               |                    | 5                  | 5                            |                |      |     |              |    |         |     |       |
| CWF4_Spo             | 548  | I-AHLE             | -----                         | DDDEEPPN           | ---EEV             | -ASPTAVVRARNVFENAL           | -AHLRQQGLKEERV | 593  |     |              |    |         |     |       |
| SYF3_human           | 720  | L                  | -----                         | ---                | SSGKEG             | SLTKCRQIYEEAN                | -KTMRNCEEKEERL | 752  |     |              |    |         |     |       |
| CWF3_Spo             | 600  | E-KFGKAKRSISI      | -LEKAADK                      | VKTADRLAIYNVLLVKV  | -ALNYGVLATRTVYEKAI | -ESLSDSEVKDMCL               |                | 665  |     |              |    |         |     |       |
| SYF1_human           | 604  | E-EWGLARHAMAV      | -YERATRAVEPAQQYDMFNIYIKRA     | -AEIYGVTHTRGIYQKAI | -EVLSD             | DEHAREMCL                    |                | 669  |     |              |    |         |     |       |
| NRDE2_Cele           | 1097 | G-ELHSSGRLQVMKLQGF | TD                            | SRNSI-LNAKR        | DQQ                | -----FDPELETRLLMNSLTIMFSWMNA | ----           | 1151 |     |              |    |         |     |       |
| NRDE2_human          | 1009 | N-KSHSASKTRRF      | -FDTITRS                      | AKPL-EPWLFAIE      | -----AEKLRKRLVETV  | -QLDGREI                     | ----           | 1059 |     |              |    |         |     |       |
| NRL1_Spo             | 856  | QIEPTNSQYFLRT      | -LDITLNNEKLKSVAKFWRIYLKILNLRL | LNGTEWVSAITTKAL    | -ASCPCN            | ---KGVC                      | M              | 921  |     |              |    |         |     |       |
| <u>Consensus aa:</u> |      | ..c                | .p                            | .....              | s                  | ....b                        | .....sh        | .hp  | .lh | pt           | l  | ....hp  | .ph | ..... |
| <u>Consensus ss:</u> |      | h                  | h                             | hhhhhhh            | hhhhh              | h                            | hhhhhhh        | hhh  | hh  | hhhhhhhhhhhh | hh | hhhhhhh |     |       |

|                      |      |        |           |                                |                         |                |                    |           |       |     |        |    |       |
|----------------------|------|--------|-----------|--------------------------------|-------------------------|----------------|--------------------|-----------|-------|-----|--------|----|-------|
| Conservation:        |      |        |           |                                | 5                       | 5              |                    | 5         |       |     |        |    |       |
| CWF4_Spo             | 594  | V      | -----     | ---                            | LLEAWKQFEAM             | ---HGTE        | -DTRKHVSSLMPQVVKKR |           | 626   |     |        |    |       |
| SYF3_human           | 753  | M      | -----     | ---                            | LLESWRSFEEE             | ---FGTA        | -SDKERVDKLMPEKVKKR |           | 785   |     |        |    |       |
| CWF3_Spo             | 666  | RF     | AEETKLGE  | IDRARLIYIHGSQYCDPRVETDYWKAWQEF | EIR                     | ---YGNPEETVKEM | -----LRIK          |           | 724   |     |        |    |       |
| SYF1_human           | 670  | RF     | ADMECKLGE | IDRARAIYSFCSQICDPRTTGAFWQ      | TWKDFEVR                | ---HGNE        | -DTIKEM            | -----LRIR | 727   |     |        |    |       |
| NRDE2_Cele           | 1152 | -----  | ---       | ANRIGDAG                       | -NQILYKNWKREAN          | ---TRDP        | -AIWRQV            | -----IRVA | 1187  |     |        |    |       |
| NRDE2_human          | 1060 | -----  | ---       | HATIPETG                       | -LMHRIQALFENAMRSDSGSQCP | -LLWRMY        | -----LNFL          |           | 1099  |     |        |    |       |
| NRL1_Spo             | 922  | DVIDLL | LKK       | ---EMESRAIICYIIM               | -----LEKGRVH            | ---N           | -EIRRDV            | -----LKFE | 962   |     |        |    |       |
| <u>Consensus aa:</u> |      | .....  | .....     | .....                          | hhps                    | hpb            | .hp                | .....s    | ....h | +ph | .....l | +b | ..... |
| <u>Consensus ss:</u> |      | h      |           | hhhh                           |                         | hhhhhhhhhhhh   |                    | h         | hhhhh |     | hhhh   |    |       |

|               |      |          |                         |                  |                   |                           |                             |        |
|---------------|------|----------|-------------------------|------------------|-------------------|---------------------------|-----------------------------|--------|
| Conservation: |      | 5        |                         | 6                |                   | 5                         | 5                           |        |
| CWF4_Spo      | 627  | RRLED    | ----                    | GSFEEY           | -----LDY          | LFPDTATDQGD               | KM-----RKMLELSRKWKEEMAKKKLE | 673    |
| SYF3_human    | 786  | RKVQT    | DDGSDAGWEEY             | -----FDY         | IFPEDAANQPN       | -----LKL                  | LAMAKLWKKQQQEKEDA           | 835    |
| CWF3_Spo      | 725  | RSVQ     | TKFSTD                  | SLHI             | -----AKRAAKIESAAA | -----PMDPMEQLEMEKSEGP     | KAL                         | 769    |
| SYF1_human    | 728  | RSVQ     | ATYNTQVNFM              | -----ASQMLK      | VSGSATGTVSD       | LAPGQSGMDDMKLLEQRAEQLAAEA |                             | 783    |
| NRDE2_Cele    | 1188 | SKLSQKIL | KDDAYTRARGQCTWALNLHFDYI | EAKT             | -VRK              | -----NGDLMEMIY            | LILEQSMG                    | --1242 |
| NRDE2_human   | 1100 | VS       | LGNKERSKGVFYKALQNC      | CPWAKVLYLDAVEYFP | -----DEMQEILD     | LMTEKE                    |                             | 1148   |
| NRL1_Spo      | 963  | RGDEL    | -----                   | ---              | ILSPN             | -----                     |                             | 972    |

[Consensus aa:](#)      pp1p.....ss@.....s..b.cs.....hpb1bbb.pp.....  
[Consensus ss:](#)      hhhhh      hhhhhh      hh      h      hhhhhhhhhhhhhhh

Conservation:  
 CWF4\_Spo      674    A----- 674  
 SYF3\_human    836    EHHPD-----EDVDESES----- 848  
 CWF3\_Spo      770    -----AGFVLSKSNPQETSKITGEEN----- 790  
 SYF1\_human    784    ERDQPLRAQSKILFVRSDASREELAELAQQVNP EEIQLGEDEDEMDLEPNEVRLEQQSVPAAVFGSLK 853  
 NRDE2\_Cele    1243    -----QEHSLFVTDEEYMKTQQEIGLQY-----SESGR----- 1270  
 NRDE2\_human   1149    LRVRLPL-EELELLLED----- 1164  
 NRL1\_Spo  
[Consensus aa:](#)      .....  
[Consensus ss:](#)

Conservation:  
 CWF4\_Spo      --  
 SYF3\_human    --  
 CWF3\_Spo      --  
 SYF1\_human    854    ED    855  
 NRDE2\_Cele    --  
 NRDE2\_human   --  
 NRL1\_Spo      --  
[Consensus aa:](#)      ..  
[Consensus ss:](#)

Figure S2. NRDE-2 like proteins are structurally similar to Syf1 and Syf3 splicing factors. NRDE-2 proteins from *S. pombe* (Spo), *C. elegans* (Cele) and *H. sapiens* (human), and the Syf1 and Syf3 factors from human and *S. pombe* (Cwf3 and Cwf4), were aligned using PROMALS3D as described in Figure S1.

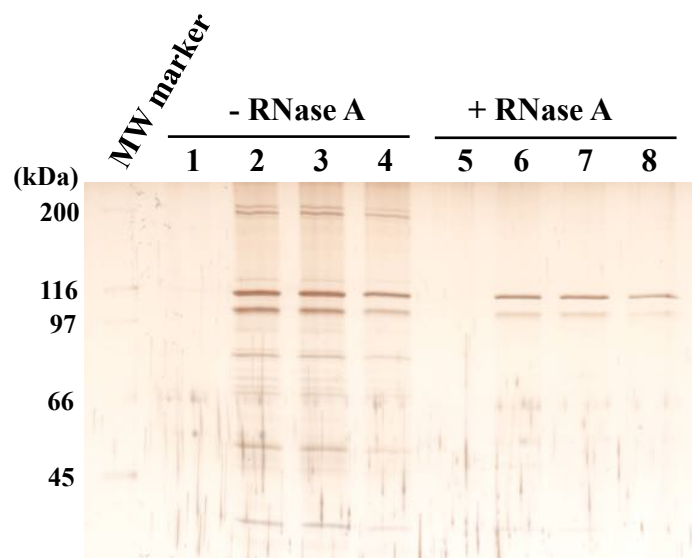

Figure S3. Silver staining of Nrl1 associated proteins. Protein complexes associated with Nrl1-TAP were isolated by tandem affinity purification. 10  $\mu$ l of protein fraction eluates from purifications carried out without RNase A treatment (lane 1-4, - RNase A) or in presence of RNase A (lane 5-8, + RNase A) were separated by 8% SDS-PAGE and visualized by silver staining. Molecular weight markers (MW marker) are indicated on the left.

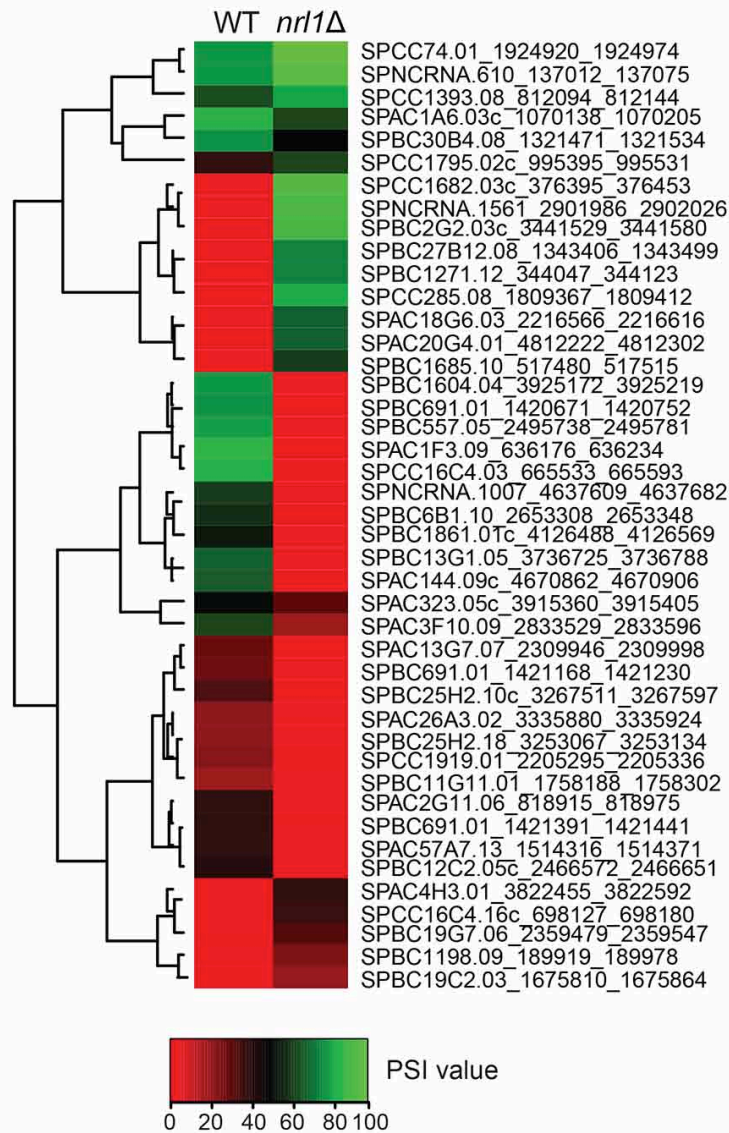

Figure S4. *Nr1* strains display splicing defects. Heatmap of splicing changes by differences in the PSI values between WT and *nr1Δ*. 43 genes displayed significant PSI differences between WT and *nr1Δ*. For the dendrogram shown, hierarchical clustering was performed using Euclidean distance. In each entry of the heatmap the gene and the genomic coordinates of the respective intron are depicted (see Table S2 for details). The heatmap was built using the gplots R package (heatmap.2 function).

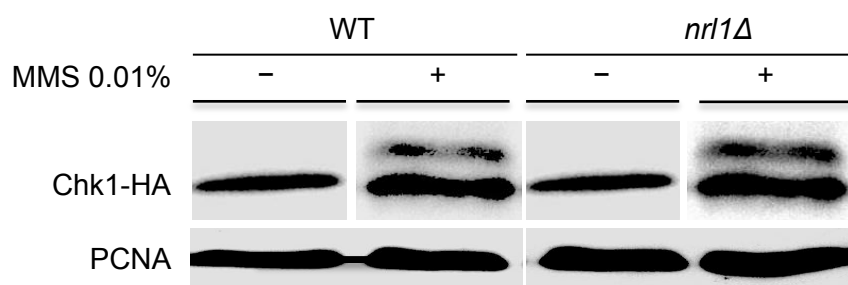

Figure S5. *nrl1*Δ cells maintain a functional DNA damage checkpoint. WT and *nrl1*Δ strains harboring a Chk1 protein tagged with Hemagglutinin (HA) at OD=0.3 were grown for 4 hours in YE6S in presence (+) or absence (-) of MMS (0.01%). Levels of phosphorylated Chk1 protein were analyzed by western blot using the mouse monoclonal anti-HA antibody 12CA5 (Abcam). Activation of Chk1 results in a slower migrating species because of phosphorylation of S345 by Rad3.

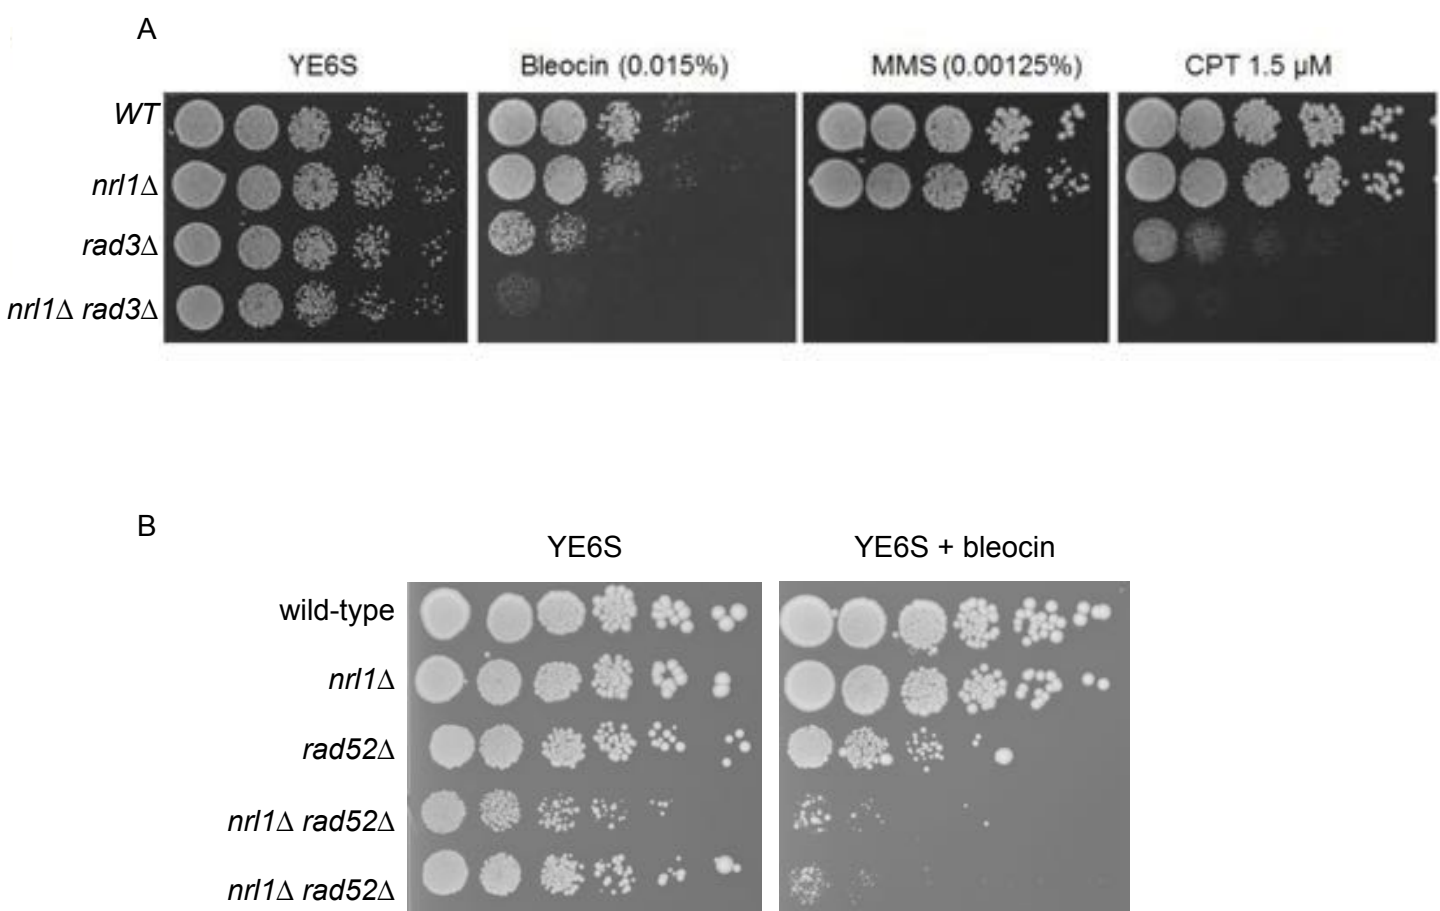

Figure S6. *nrl1* $\Delta$  *rad3* $\Delta$  and *nrl1* $\Delta$  *rad52* $\Delta$  strains are hypersensitive to low levels of genotoxic agents. (A) Fivefold serial dilutions of WT (TH2094) and *nrl1* $\Delta$  (TH8103), *rad3* $\Delta$  (TH585) and *nrl1* $\Delta$  *rad3* $\Delta$  (TH8127) on YE6S, methyl methanesulfonate (MMS), bleomycin (Bleo) and camptothecin (CPT) at indicated concentrations. (B) Fivefold serial dilutions of WT (TH2093) and *nrl1* $\Delta$  (TH8340), *rad52* $\Delta$  (TH2129) and *nrl1* $\Delta$  *rad52* $\Delta$  (TH8698-9) on YE6S, and YE6S with 0.2 $\mu$ g/ml bleocin.

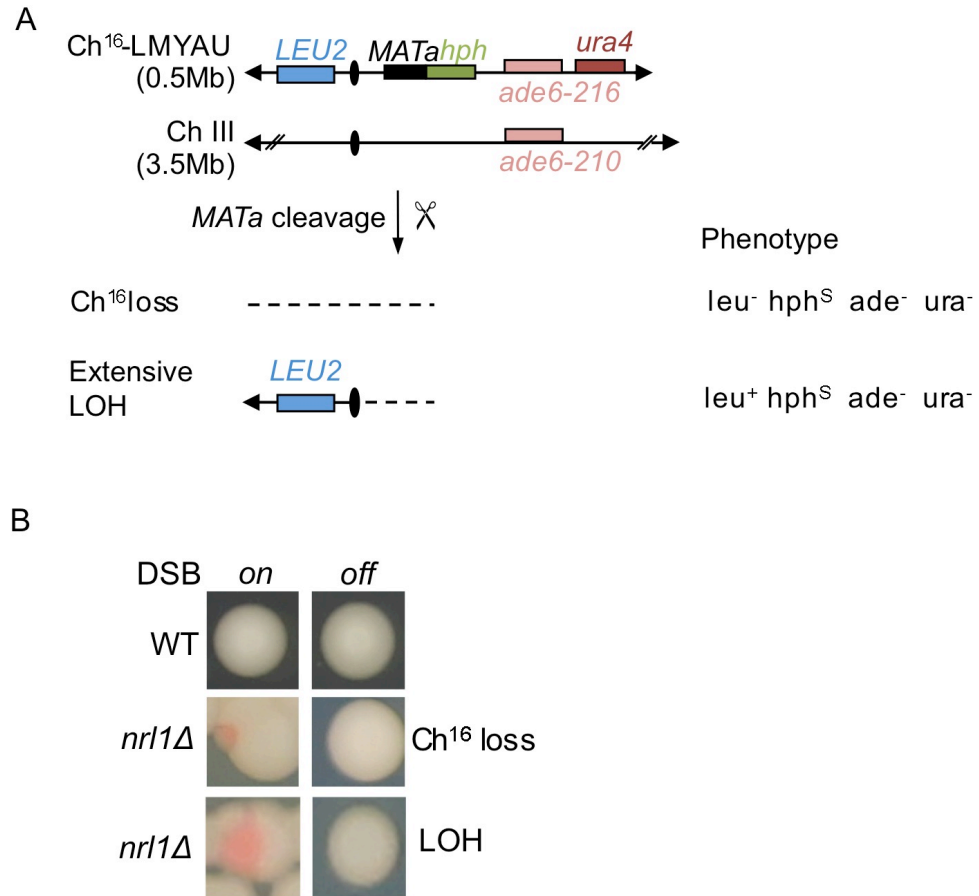

Figure S7 Loss of Nrl1 results in break-induced chromosome loss and chromosomal rearrangements. (A) Schematic of the minichromosome Ch<sup>16</sup>-LMYAU and outcomes leading to increased break-induced colony sectoring. Derepression of HO endonuclease (by removal of thiamine) generates a DSB at the *MATa* target site (indicated by scissors). (B) Colony sectoring DSB assay of *nrl1Δ* (TH8103). Sectoring resulting from break-induced Ch<sup>16</sup> loss (indicated) was detected on EMM plus leucine, uracil and low adenine (5 mg/L) while sectoring resulting from break-induced LOH (indicated) was detected on EMM plus uracil and low adenine (5 mg/L) in the presence (DSB off) or absence (DSB on) of thiamine.

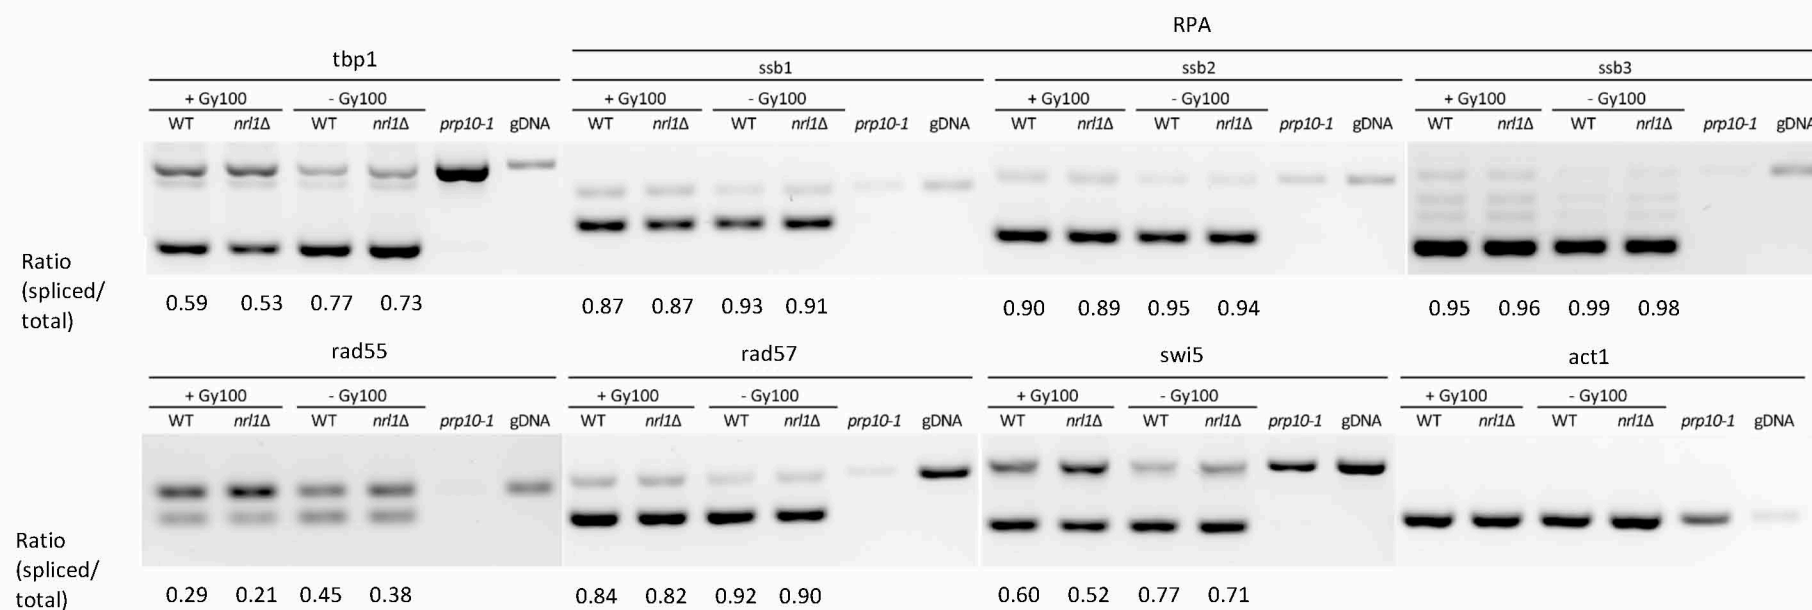

Figure S8. *nrl1*+ deletion does not affect the splicing of HR factors shown acting upstream of Rad51. Total RNA was isolated from non-irradiated (-Gy100) and irradiated (+Gy100) wildtype (WT) and *nrl1Δ* cells, treated with DNase I (Roche), and reverse transcribed (OmniScript, Qiagen). PCR was carried out with primers designed to span at least one exon. As controls, total RNA from a splicing factor mutant (*prp10-1*) and genomic DNA were used. Ratios between the spliced and total (spliced+unspliced) products are presented. Band intensities were measured using ImageJ, (<http://imagej.nih.gov/ij/>). *ssb1-3* indicate the three subunits of RPA; *tbp1* (TATA-binding-protein 1) : non-HR control; *act1*: loading control.

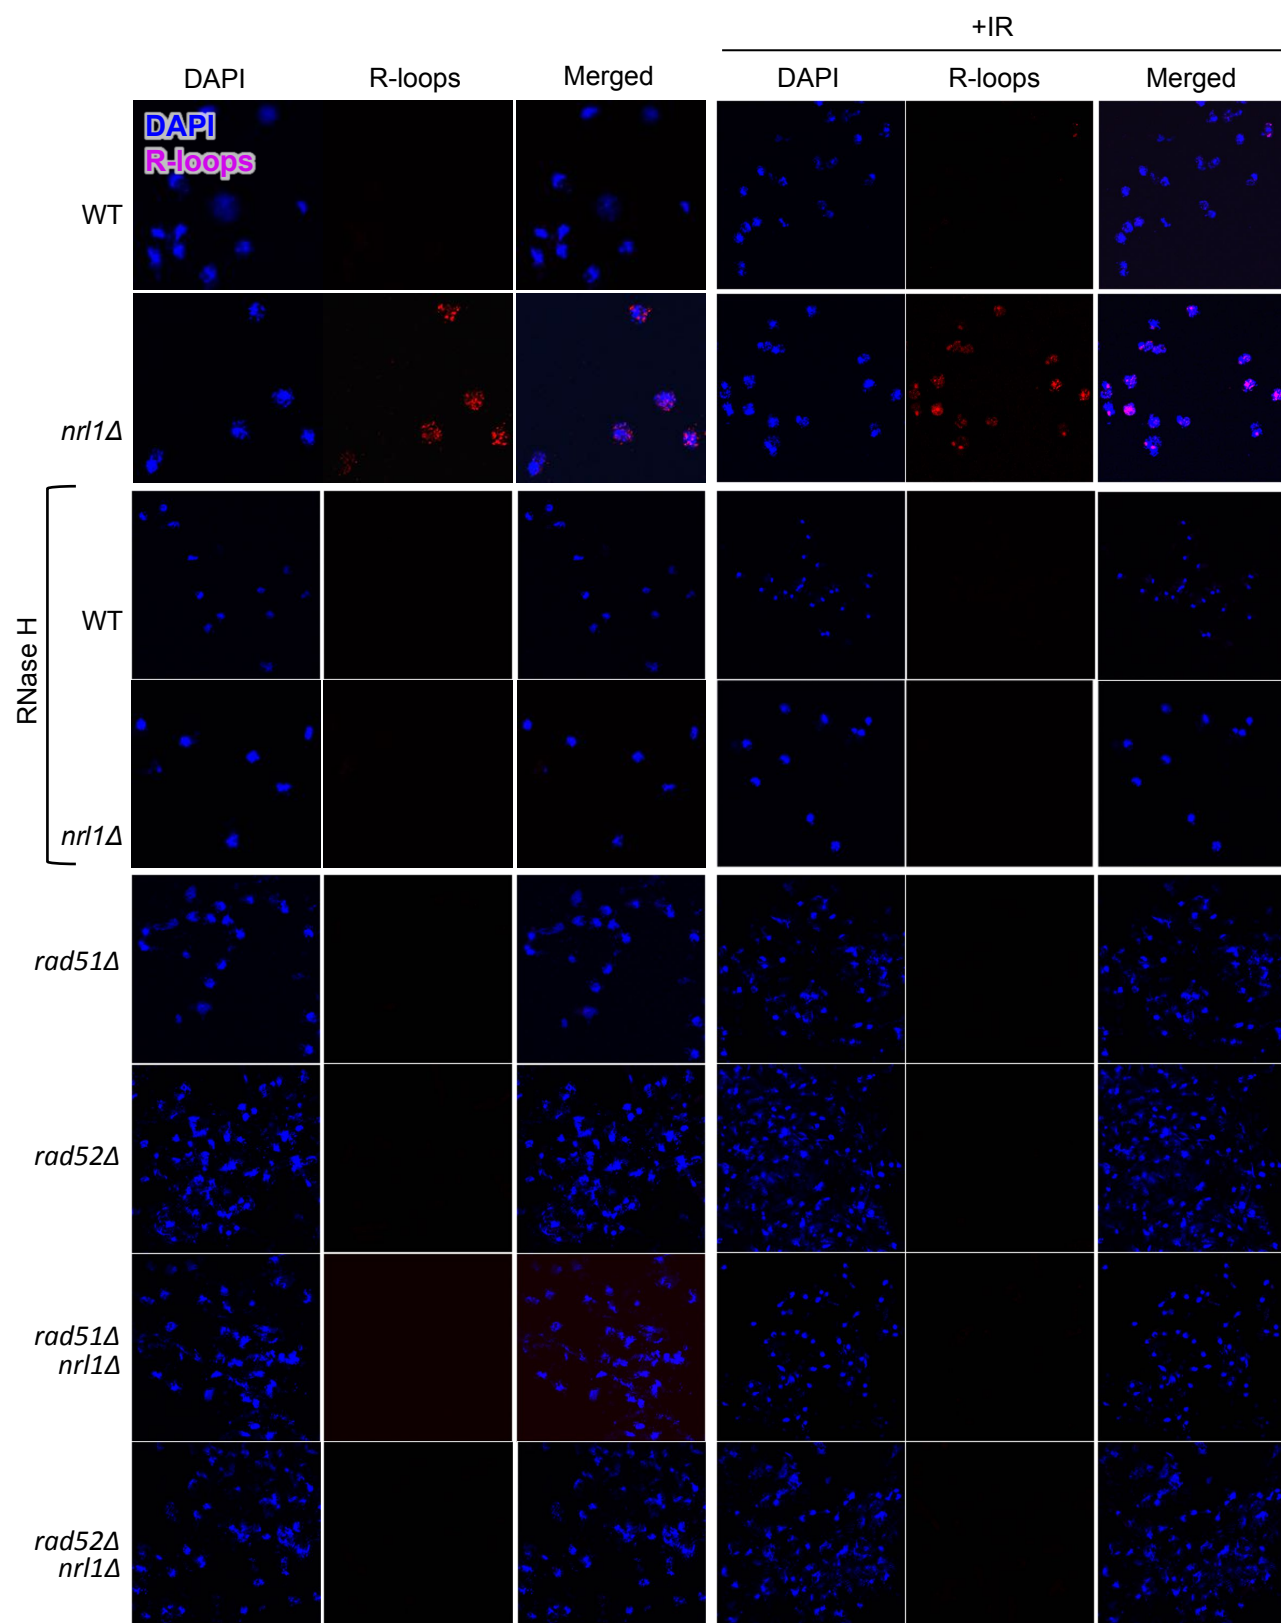

Figure S9. R-loop accumulation in WT, *nrl1Δ*, *rad51Δ*, *rad52Δ*, *rad51Δ nrl1Δ* and *rad52Δ nrl1Δ* prior and upon IR exposure. Chromosome spreads were immunostained using the S6.9 antibody as previously described [52]. As negative control, the spreads were pre-treated with RNase H (+ RNase H) before immunostaining. +IR: The cells were exposed to 100 Gy of IR before immunostaining.

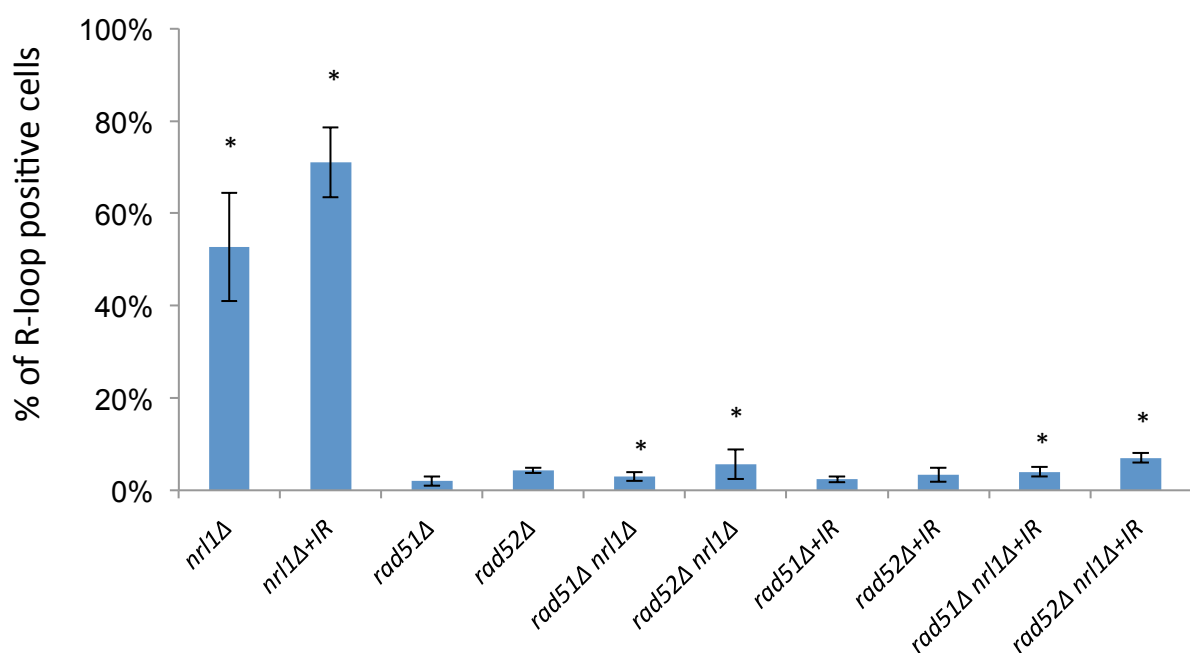

Figure S10. Quantification of R-loop positive nuclei in WT, *nrl1Δ*, *rad51Δ*, *rad52Δ*, *rad51Δ nrl1Δ* and *rad52Δ nrl1Δ* strains before and after IR exposure. +IR: The cells were exposed to 100 Gy of IR and incubated for 4 hrs before immunostaining. Mean and standard deviation were scored from triplicate experiments,  $n > 200$ . The asterisks (\*) indicate significant differences compared with WT as determined by paired T-test ( $p \leq 0.05$ ). +IR: The cells were exposed to 100 Gy of IR before immunostaining.

## **Supplemental methods and detailed protocols**

### **Protein purification**

Cells expressing Nrl1-TAP were grown in 16 L of complete yeast extract medium (YE+5S) to mid-log phase (OD ~0.8). 8 L of culture was concentrated to 300 mL and exposed to 100 Gy of gamma irradiation (+IR, 3.3 Gy/min) in a 500 ml conical, for a total of 30 min. After irradiation cells were resuspended in 8 L of YE+5S medium and recovered for 30 min at 30°C. The same procedure was applied for control cells (-IR), except irradiation step. Following, cells were harvested by centrifugation and Nrl1-TAP associated proteins were isolated. Briefly, yeast cell powder was made using SPEX SamplePrep 6870 Freezer/Mill. Proteins were extracted using IPP150 buffer (1 g of powder per 3 mL of IPP150 buffer) (IPP150, 50 mM Tris pH 8.0, 150 mM NaCl, 10% glycerol, 0.1% NP-40, supplemented with complete protease and phosphatase inhibitors and 1 mM PMSF). 500 µL of IgG beads was incubated with protein extracts for 2 h at 4°C. Beads were washed with 20 volumes of IPP150 buffer, with 5 volumes of TEV cleavage buffer A (TCBA, 10 mM Tris pH 8.0, 150 mM NaCl, 10% glycerol, 0.1% NP-40, 0.5 mM EDTA), resuspended in 2 mL of TCBA supplemented with RNase A (5 µg/mL) and incubated for 30 min at 16°C. Following RNase A treatment, the samples were supplemented with DTT (1 mM) and the AcTEV™ protease (400 units) was added. The TEV cleavage step was performed for 2 h at 16°C. The eluate was supplemented with 6 µL of 1 M CaCl<sub>2</sub>, mixed with 6 mL of Calmodulin binding buffer 1 (CBB1, 10 mM Tris pH 8.0, 150 mM NaCl, 10% glycerol, 0.1% NP-40, 1 mM imidazole, 1 mM Mg-acetate, 2 mM CaCl<sub>2</sub>, 10 mM β-mercaptoethanol), 200 µL of calmodulin beads and incubated for 2 h at 4°C. The beads were washed with 10 volumes of CBB1 and 5 volumes of Calmodulin binding buffer 2 (CBB2, 10 mM Tris pH 8.0, 150 mM NaCl, 1 mM Mg-Acetate, 2 mM CaCl<sub>2</sub>, 1 mM β-mercaptoethanol). The proteins were step-eluted using 200 µL of elution buffer (10 mM Tris pH 8.0, 150 mM NaCl, 1 mM Mg-acetate, 2 mM EGTA, 1 mM β-mercaptoethanol). Eluted proteins were separated on SDS-PAGE and visualized by silver staining. Eluates from peak fractions were combined and submitted for LC-MS/MS analysis.

### **Enzymatic digest, LC-MS/MS analysis and data analysis**

The pH of the eluted protein sample was adjusted to 8.5, disulfide bonds were reduced with DTT and subsequently alkylated with iodoacetamide. Proteins were digested with trypsin (recombinant, proteomics grade, Roche; 1:25 of the estimated

amount of protein) at 37°C overnight and stopped by addition of trifluoroacetic acid (TFA) to approx. pH 2. Digests were separated on an UltiMate 3000 RSLCnano LC system (Dionex, Thermo Fisher Scientific). Peptides were loaded onto a trapping column (PepMap C18, 5µm particle size, 300 µm i.d. x 5mm, Dionex, Thermo Fisher Scientific) equilibrated with 0.1% TFA and separated on an analytical column Acclaim PepMap RSLC C18, 50 cm × 75 µm × 2 µm, 100 Å, Dionex, Thermo Fisher Scientific) applying a 60 minutes linear gradient from 1.6% up to 30% acetonitrile (ACN). The HPLC (nano RSLC from Dionex, Thermo Fisher Scientific) was directly coupled to a QExactive mass spectrometer (Thermo Fisher Scientific) via a nanoelectrospray ionization source (Proxeon, Thermo Fisher Scientific). The electrospray voltage was set to 1900 V. The QExactive mass spectrometer was operated in the data-dependent mode: 1 full scan (m/z: 350-1650, resolution 70000) with lock mass enabled was followed by maximal 12 MS/MS scans. The lock mass was set at the signal of polydimethylcyclsiloxane at m/z 445.120025. The 12 most intense ions were fragmented by higher energy collisional dissociation (HCD) with normalized collision energy of 30. Fragment spectra were acquired with a resolution of 17500. The ion target value for full MS was set to 1,000,000, for MS/MS to 100,000. Fragmented ions were excluded from further selection for 30 s. Raw data were searched with MaxQuant 1.5 against the *S. pombe* DB (5144 entries, 2013-05-09, <http://www.pombase.org/>) including the contaminant collection with the following parameters: trypsin was selected as protease allowing two missed cleavages, carbamidomethylcysteine was set as static modification, oxidation of methionine, phosphorylation of serine, threonine and tyrosine as well as protein N-terminal acetylation as variable modifications. Precursor tolerance was set to 4.5 ppm and 20 ppm MS/MS for the fragment tolerance. Results were filtered at the peptide and at the protein level to 1% FDR. Relative quantification was based on the total peak intensities for each protein calculated with MaxQuant. For comparison protein intensities were normalized to the intensity of Nrl1 in proliferating cells.
